# Supplementary material for: Microscopic effects of the bonding configuration of nitrogen-doped graphene on its reactivity toward hydrogen peroxide reduction reaction
Source: Royal Society of Chemistry journal article supplement (doi:10.1039/c3cp50900a), 2013-01-01
Supplement: c3cp50900a.pdf [file c3cp50900a.pdf]

## Electronic Supplementary Information:

# Microscopic effects of the bonding configuration of nitrogen-doped graphene on its reactivity toward hydrogen peroxide reduction reaction

Ping Wu, Pan Du, Hui Zhang and Chenxin Cai\*

*Jiangsu Key Laboratory of New Power Batteries, College of Chemistry and Materials Science, Nanjing  
Normal University, Nanjing 210097, P.R. China*

\* Corresponding author, E-mail: [cxcai@njnu.edu.cn](mailto:cxcai@njnu.edu.cn) (C. Cai)

**Table S1** Adsorption energy of oxidants and reductants in each reaction step of H<sub>2</sub>O<sub>2</sub> reduction on graphene

|                         |                                  | $G \cdots H_2O_2 + H^+ + e^- \rightarrow G-OH + H_2O$ | $G-OH + H^+ + e^- \rightarrow G + H_2O$ |
|-------------------------|----------------------------------|-------------------------------------------------------|-----------------------------------------|
| pristine<br>graphene    | $E_{ad}$ (oxidants) (kJ / mol)   | -9.645                                                | -18.523                                 |
|                         | $E_{ad}$ (reductants) (kJ / mol) | -18.523                                               | -16.787                                 |
|                         | $\Delta E$ (kJ / mol)            | 8.878                                                 | -1.736                                  |
| pyridinic<br>N-graphene | $E_{ad}$ (oxidants) (kJ / mol)   | -45.344                                               | -61.363                                 |
|                         | $E_{ad}$ (reductants) (kJ / mol) | -61.363                                               | -51.810                                 |
|                         | $\Delta E$ (kJ / mol)            | 16.019                                                | -9.553                                  |
| pyrrolic<br>N-graphene  | $E_{ad}$ (oxidants) (kJ / mol)   | -44.369                                               | -57.493                                 |
|                         | $E_{ad}$ (reductants) (kJ / mol) | -57.493                                               | -51.896                                 |
|                         | $\Delta E$ (kJ / mol)            | 13.124                                                | -5.597                                  |
| graphitic<br>N-graphene | $E_{ad}$ (oxidants) (kJ / mol)   | -14.958                                               | -24.748                                 |
|                         | $E_{ad}$ (reductants) (kJ / mol) | -24.748                                               | -20.888                                 |
|                         | $\Delta E$ (kJ / mol)            | 9.790                                                 | -3.860                                  |

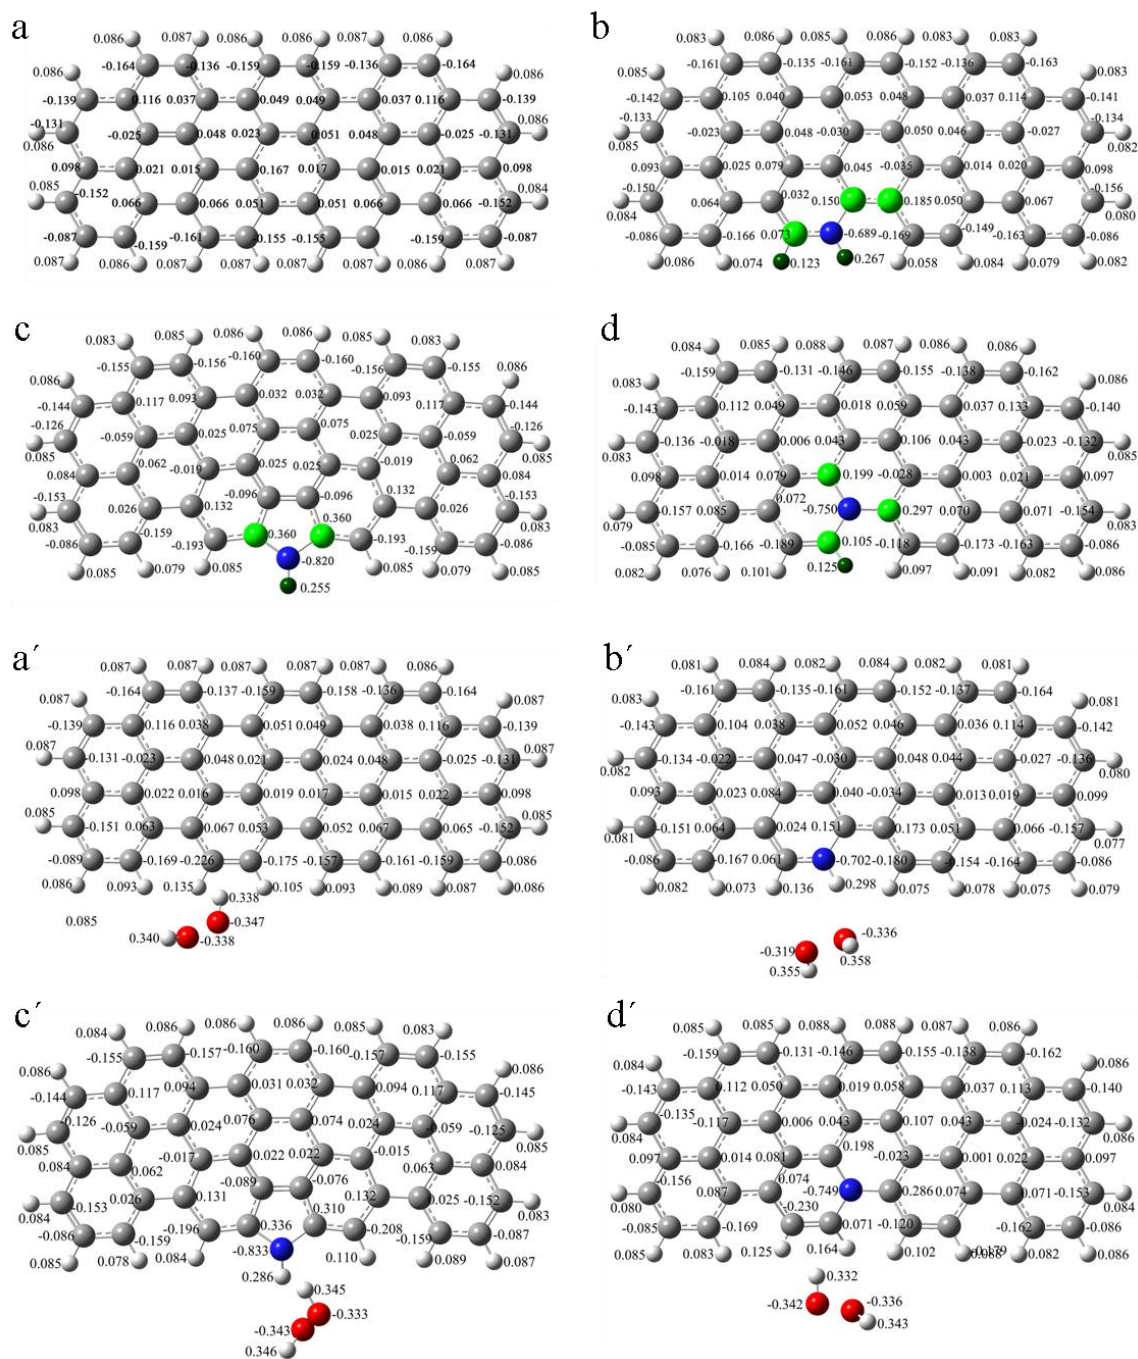

**Fig. S1** Charge densities on each atom in pristine (a, a') and N-graphene with pyridinic (b, b'), pyrrolic (c, c'), and graphitic N-doped structure (d, d'), respectively, in their optimized forms before (a–d) and after (a'–d') H<sub>2</sub>O<sub>2</sub> adsorption. Atomic color code: gray, carbon; red, oxygen; white, hydrogen; and blue, nitrogen. The green and dark green balls are those carbon and hydrogen atoms, respectively, having significant enhancement in charge density after N doping.

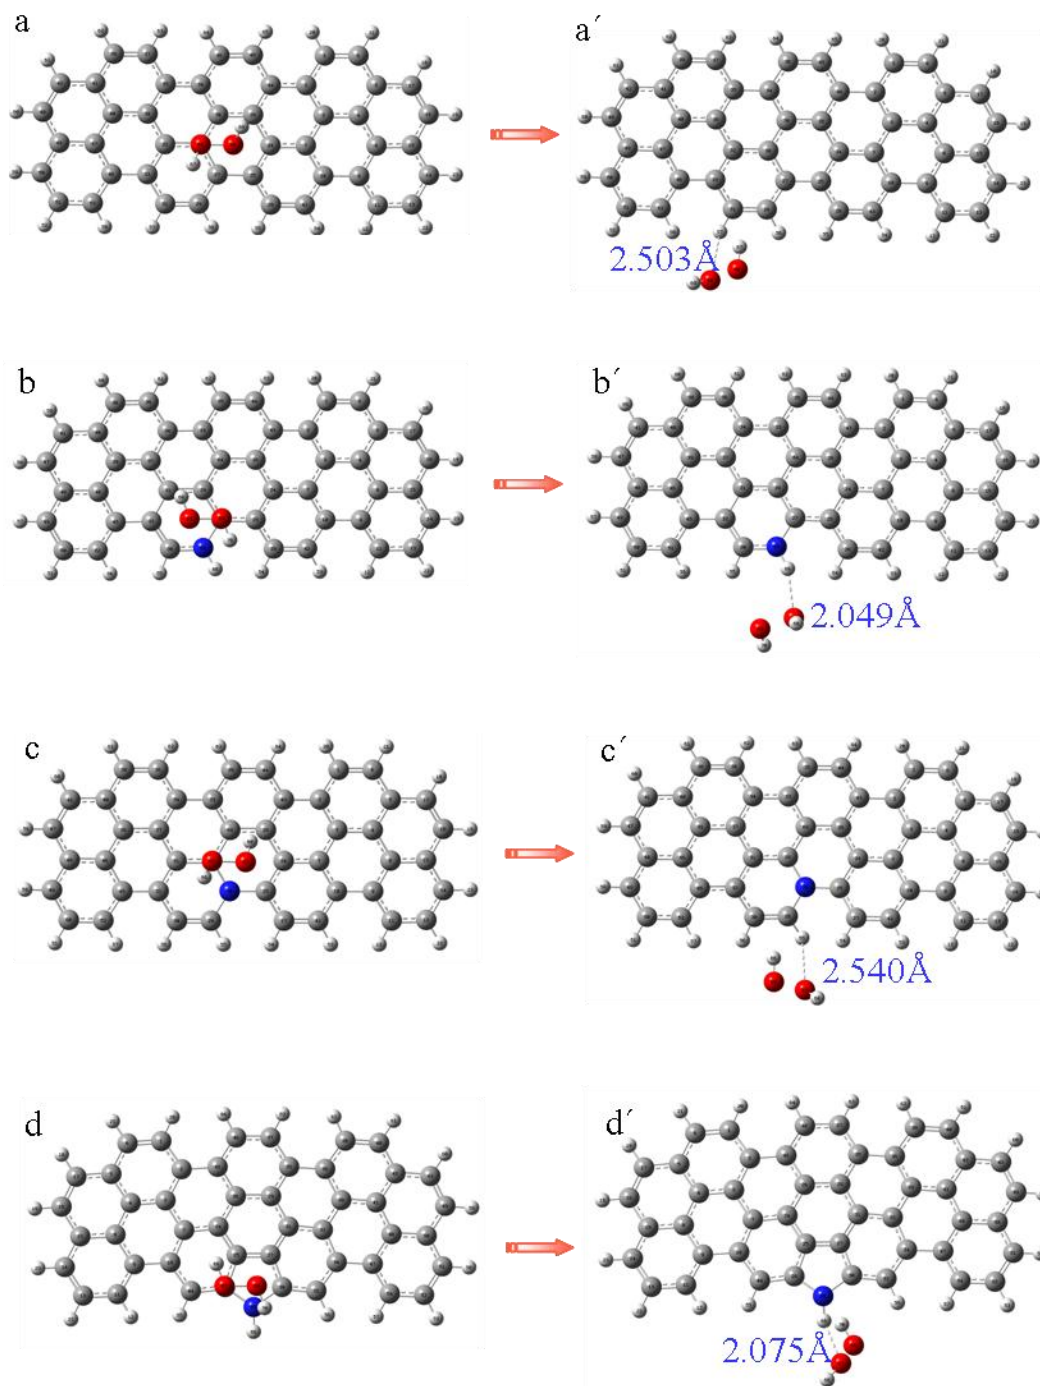

**Fig. S2** Optimized structure for the adsorption of H<sub>2</sub>O<sub>2</sub> molecules onto the pristine (a, a'), pyridinic (b, b'), pyrrolic (c, c'), and graphitic N-doped graphene sheet. (a–d) and (a'–d') illustrate the initial position and final optimization structure for the adsorption of the H<sub>2</sub>O<sub>2</sub> molecule, respectively. Atomic color code: gray, carbon; red, oxygen; white, hydrogen; and blue, nitrogen.

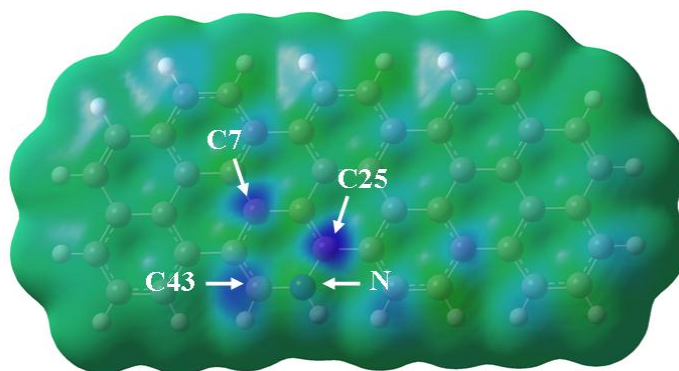

**Fig. S3** The spin density distribution on the pyridinic N-doped graphene. The C7, C25, and C43 atoms have higher spin densities than other carbon atoms. The high spin density is favor to the formation of chemical bond of C–O.

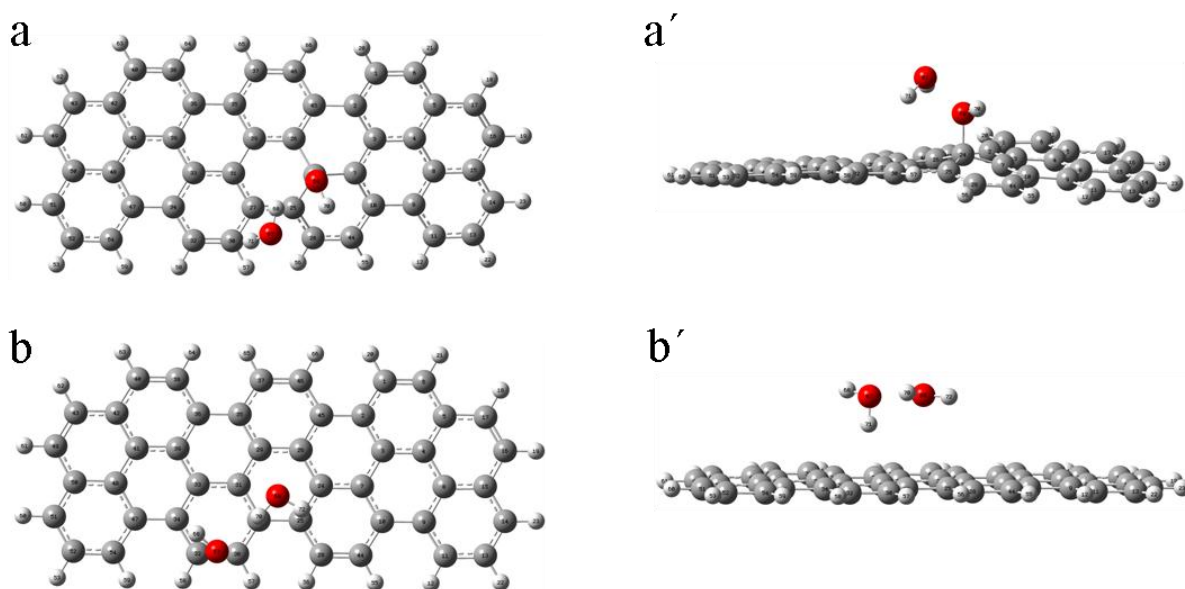

**Fig. S4** Top (a, b) and side (a', b') views of the optimized configurations of steps 2a and 3a of H<sub>2</sub>O<sub>2</sub> reduction processes at the surface of pristine graphene for reaction path I. (a, a') Cleavage of the O–O bond in the adsorbed H<sub>2</sub>O<sub>2</sub> molecule and formation of one adsorbed OH group and the first H<sub>2</sub>O molecule; (b, b') cleavage of the C–O bond and the formation of the second H<sub>2</sub>O molecule. Atomic color code: gray, carbon; red, oxygen; and white, hydrogen.

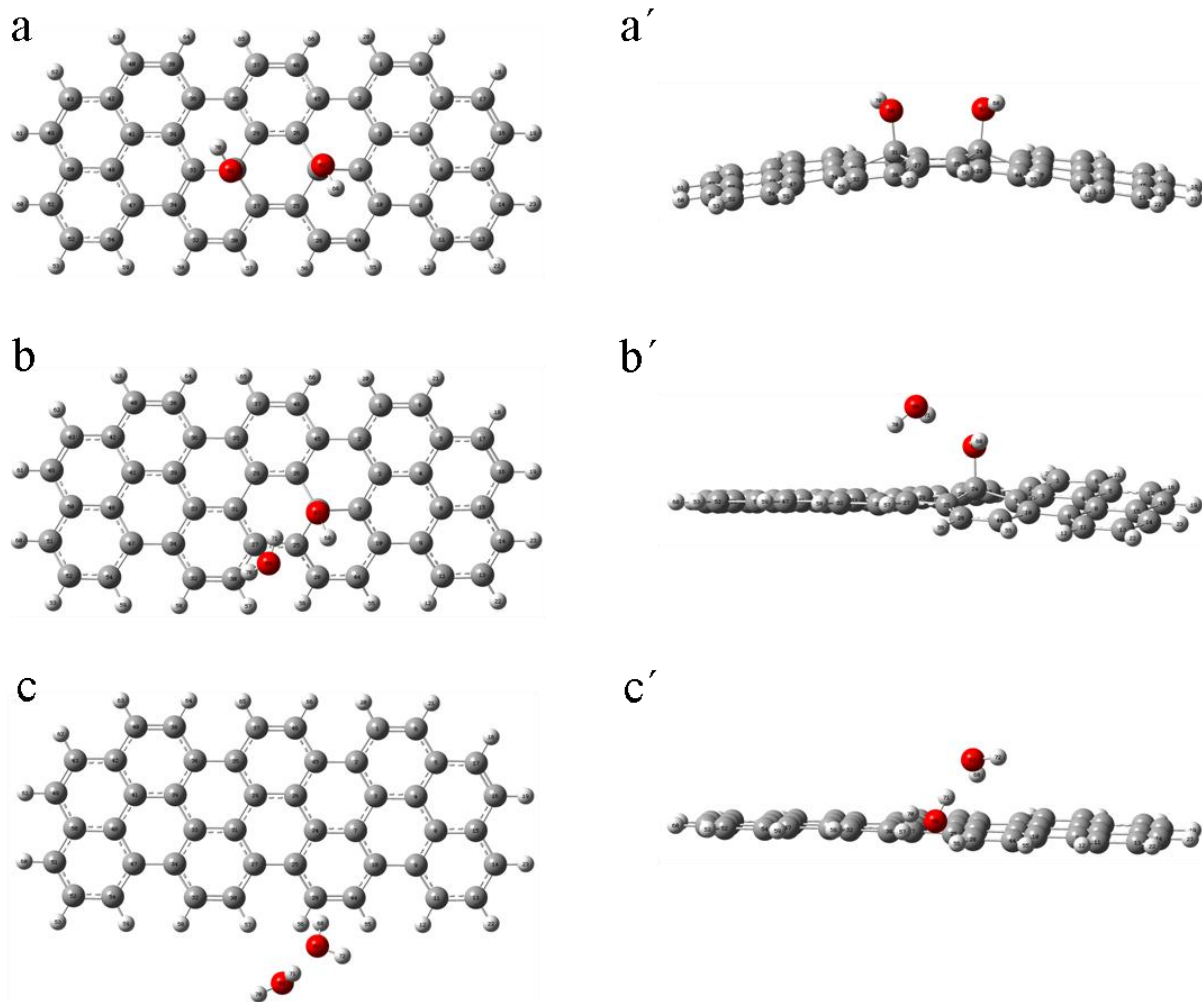

**Fig. S5** Top (a, b, and c) and side (a', b', and c') views of the optimized configurations of steps 2b, 3b, 4 for H<sub>2</sub>O<sub>2</sub> reduction processes at the surface of pristine graphene for reaction path II. (a, a') Cleavage of the O–O bond in the adsorbed H<sub>2</sub>O<sub>2</sub> molecule and formation of two adsorbed OHs; (b, b') formation of the first H<sub>2</sub>O molecule; (c, c') formation of the second H<sub>2</sub>O molecule. Atomic color code: gray, carbon; red, oxygen; and white, hydrogen.

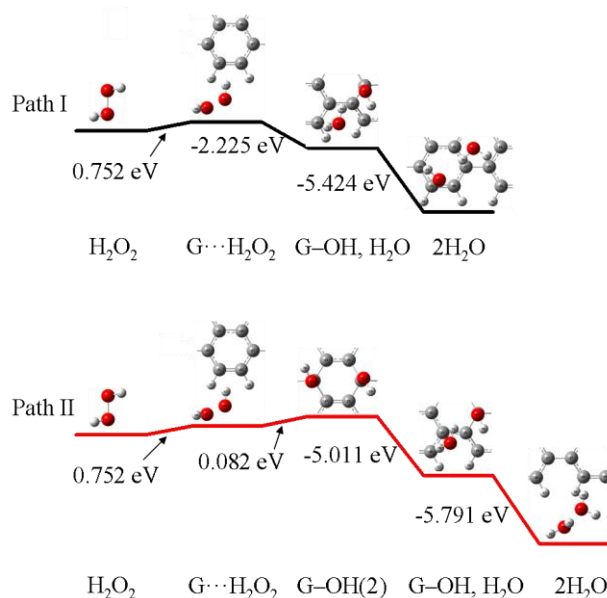

**Fig. S6** Illustration of the relative energy and configurations for the reaction intermediates (showing only part of the graphene) in reaction paths I and II of the  $\text{H}_2\text{O}_2$  reduction process on pristine graphene surface. The values are the relative energies for each step of the reaction system. For the first step, the reference energy state is the free energy of the optimized pristine graphene and isolated  $\text{H}_2\text{O}_2$  molecule. For the other reaction steps, the reference energy states are the free energy of the product of the previous reaction and  $\text{H}^+ + \text{e}^-$ . Atomic color code: gray, carbon; red, oxygen; white, hydrogen; and blue, nitrogen.

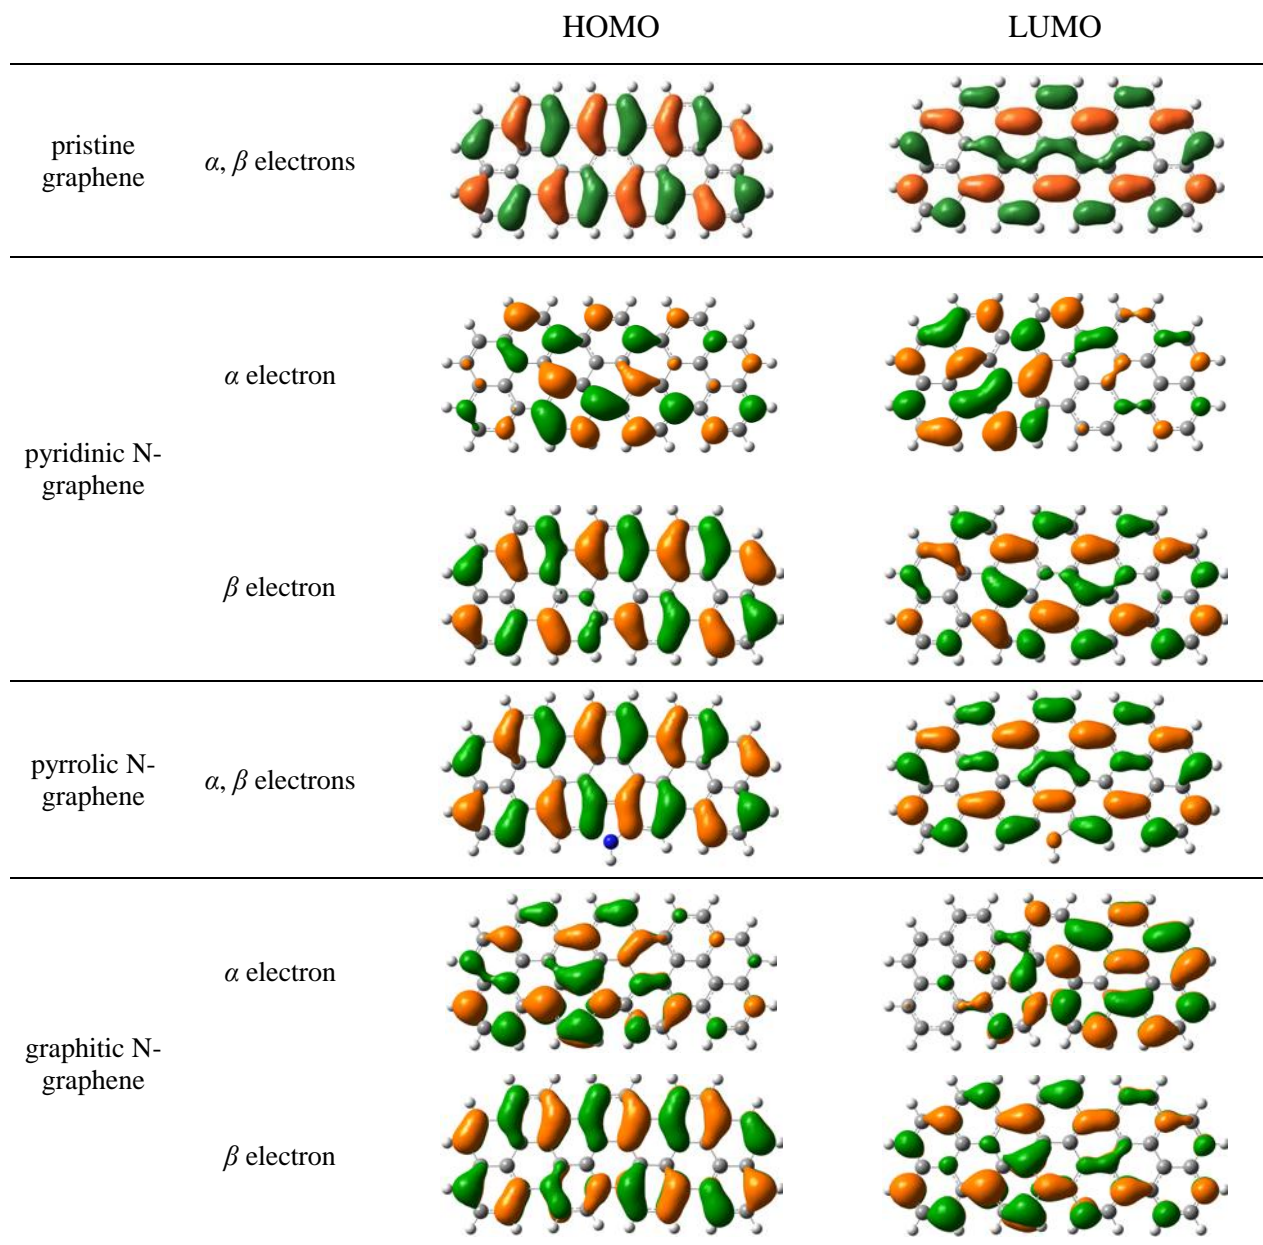

**Fig. S7** HOMO and LUMO spatial distributions of  $\alpha$  electron and  $\beta$  electron for pure graphene and N-graphene with pyridinic, pyrrolic, and graphitic N-doped structure, respectively.
